# Supplementary material
Source: publisher figshare collection journal article supplement (https://brill.figshare.com/ndownloader/files/36144006)
Supplement: Supplementary file 1 [file 36144006]

# **Exploring human factors of wildlife conservation along a forest gap using a participatory design-build canopy bridge**

Yibo Fan<sup>a,\*</sup> and Stacy Lindshield<sup>b</sup>

<sup>a</sup>Department of World Languages and Cultures, Iowa State University, Ames, IA 50011, USA

<sup>b</sup>Department of Anthropology, Purdue University, West Lafayette, IN 47907, USA

\*Corresponding author; e-mail: [yfan.antr@gmail.com](mailto:yfan.antr@gmail.com)

ORCID iD: Lindshield: 0000-0002-4507-1502

**Supplementary material**

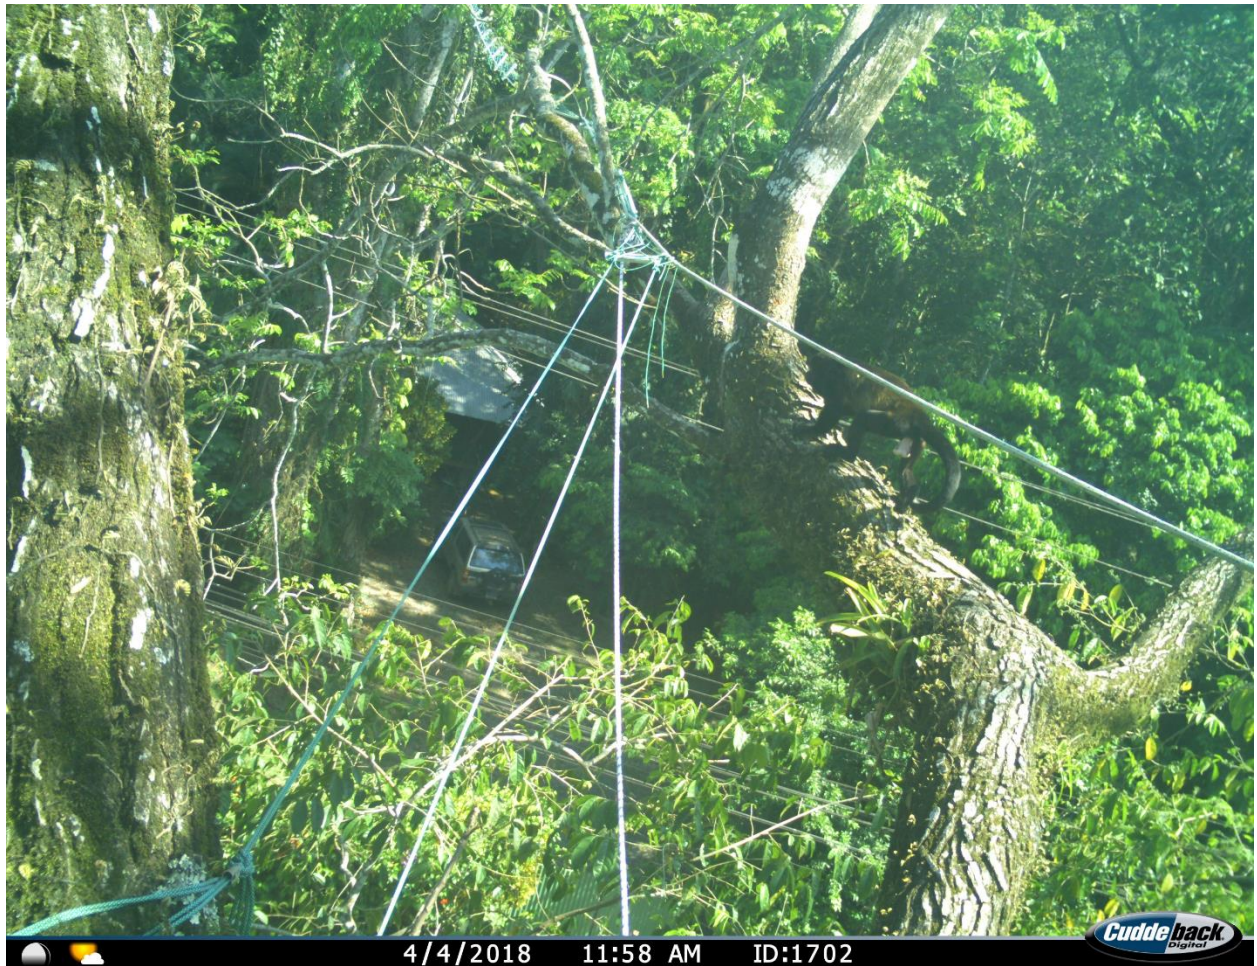

**Figure S1.** *Alouatta palliata* near the bridge.

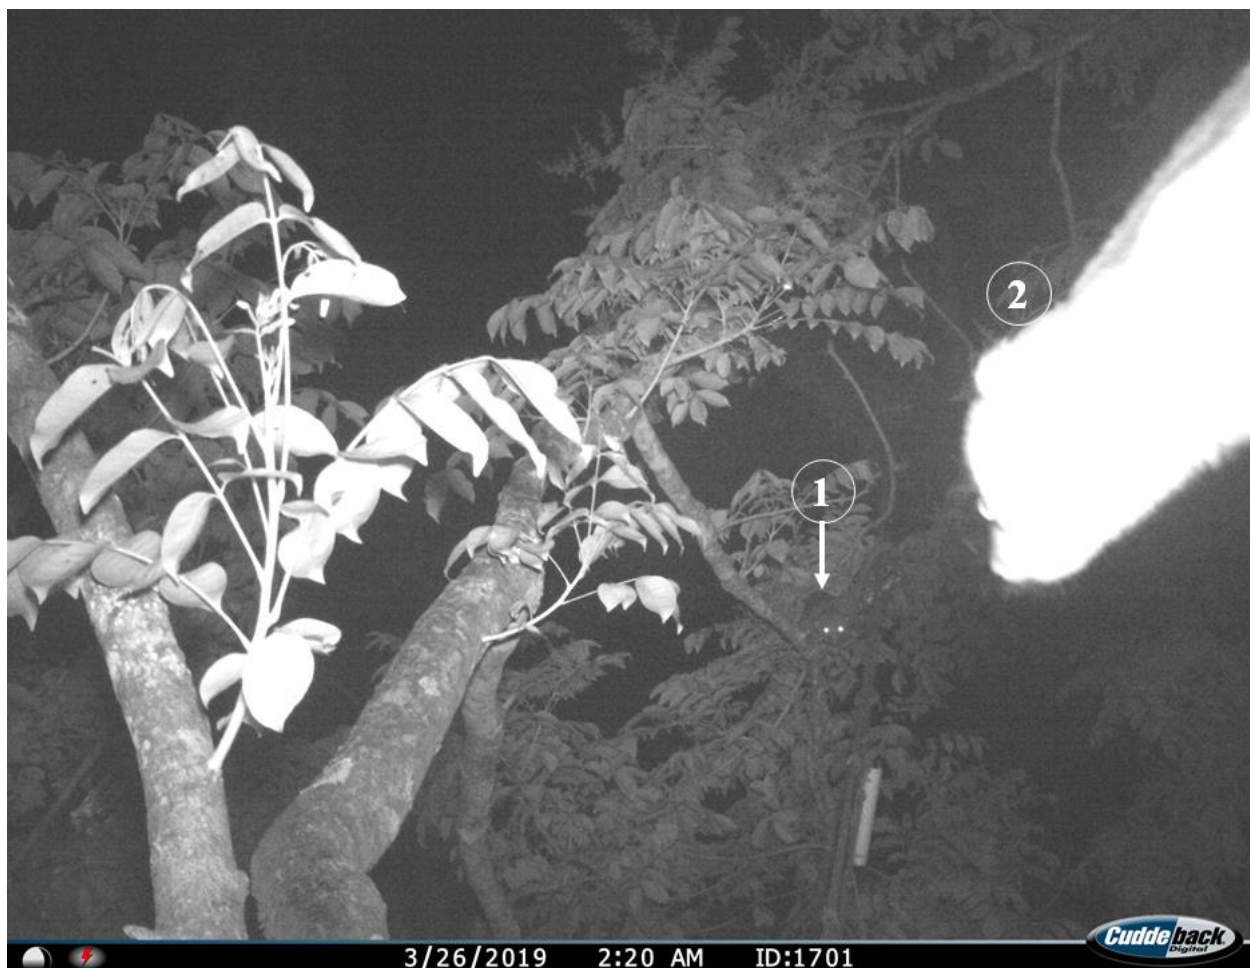

**Figure S2.** *Potos flavus*. 1) *Potos flavus* grabbing the bridge with its tail and going off the bridge onto a tree branch. 2) *Potos flavus* near the camera trap.
